# Supplementary material
Source: publisher figshare collection journal article supplement (https://acs.figshare.com/ndownloader/files/5765523)
Supplement: Supplementary file 1 [file 5765523]

JA 991780 ↓

## **SUPPORTING INFORMATION.**

### **Dynamics of Ferrocene Labeled Polyethylene Glycol Chains Terminally Attached to the Outermost Monolayer of Successively Self-Assembled Monolayers of Immuno Proteins. Elastic Bounded Diffusion**

Agnès Anne, Christophe Demaille and Jacques Moiroux

*Contribution from the Laboratoire d'Electrochimie Moléculaire, Unité Mixte de Recherche Université - CNRS No 7591, Université de Paris 7 - Denis Diderot, 2 place Jussieu, 75251 Paris Cedex 05, France. e-mail: demaille@paris7.jussieu.fr*

#### **Elastic bounded diffusion: numerical solution of set (3) of differential equations**

The set of equation (3) must be solved taking into account the following initial and boundary conditions:

$$\text{At } \tau = 0 \text{ and } -\mu < y < l: p = \exp\left(-\frac{\beta}{2}y^2\right), q = 0$$

$$\text{At the electrode surface, } y = -\mu: -\left(\frac{\partial p}{\partial y}\right)_{-\mu} + \beta\mu p_{-\mu} = \left(\frac{\partial q}{\partial y}\right)_{-\mu} - \beta\mu q_{-\mu}$$

At the position corresponding to full extension of the PEG chain,  $y = l$ :

$$\left(\frac{\partial p}{\partial y}\right)_l + \beta\mu p_l = \left(\frac{\partial q}{\partial y}\right)_l + \beta\mu q_l = 0$$

The dimensionless current  $\psi$  given by:

36 51

$$\psi[\operatorname{erf}(\lambda) + \operatorname{erf}(\lambda_{fs})] = (\partial p / \partial y)_{-\mu} - \beta \mu p_{-\mu} = -(\partial q / \partial y)_{-\mu} + \beta \mu q_{-\mu}$$

is a function of the electrode potential  $\xi$ , for given values of  $\beta$ ,  $\lambda_{fs}$  and  $\lambda$ , the last two parameters being related respectively to  $l$  and  $\mu$  since  $\mu\sqrt{\beta} = \lambda/\sqrt{2}$  and  $l\sqrt{\beta} = \lambda_{fs}/\sqrt{2}$ .

The  $-\mu$  to  $l$  interval is divided into  $N$  subintervals of length  $h = (\mu + l)/N$ . The space variable  $y$  is then given by  $y = -\mu + ih$ , with  $i$  the index of the space grid. The time interval is divided into steps of width  $k$  so that the time variable is given by  $\tau = kj$ , with  $j$  the index of the time grid. Then the partial derivative equations of set (3) can be converted into their finite difference equivalents:

$$p_{i-1}^{j+1}(y\beta k/2h - r) + p_i^{j+1}(2 + 2r - k\beta) - p_{i+1}^{j+1}(r + y\beta k/2h) =$$

$$p_{i-1}^j(r - y\beta k/2h) + p_i^j(2 - 2r + k\beta) + p_{i+1}^j(r + y\beta k/2h)$$

with  $1 \leq i \leq N - 1$  and  $r = kh^2$ ,

and a similar equation is obtained for  $q$ .

The numerical equivalent of the boundary condition at the electrode surface is:<sup>17</sup>

$$(p_0^{j+1} + q_0^{j+1})[2 + 2r - k\beta + 2h\beta\mu(r + \mu\beta k/2h)] - 2r(p_1^{j+1} + q_1^{j+1}) =$$

$$2r(p_1^j + q_1^j) + (p_0^j + q_0^j)[2 - 2r + k\beta - 2h\beta\mu(r + \mu\beta k/2h)]$$

Similarly, the boundary condition at the outer edge of the mesh,  $y = l$ , is expressed by:

$$p_N^{j+1}[2 + 2r - k\beta + 2h\beta l(r + l\beta k/2h)] - 2rp_{N-1}^{j+1} = 2rp_{N-1}^j + p_N^j[2 - 2r + k\beta - 2h\beta l(r + l\beta k/2h)]$$

Similar equations are obtained for  $q$ .

The Nernst equation gives :  $p_0^{j+1} = q_0^{j+1} \exp(-\xi)$ .

Combining all the above equations leads to a system of  $2N + 2$  linear equations of  $2N + 2$  unknowns that is solved by the Gauss elimination<sup>17</sup> method using an optimized algorithm taking into account that the above system is penta-diagonal. Convergence of the computation is monitored by integrating the  $(p + q)$  concentration profile at each time step and making sure that the resulting integral does not differ by more than 1% from its initial value. If it does differ by more than 1%, the

computation is re-started with a higher value of  $N$  until a satisfying convergence is obtained. Practically, values of  $N$  ranging from 500 to 3000 giving values of  $h$  ranging from 0.1 to 0.01 were used. The current  $\psi$  is derived from the first three points of the  $p$  concentration profile:

$$\psi^{j+1}[\text{erf}(\lambda) + \text{erf}(\lambda_{\text{fs}})] = (-1.5p_0^{j+1} + 2p_1^{j+1} - 0.5p_2^{j+1})/h - \beta\mu p_0^{j+1}$$

The accuracy on the dimensionless peak current is better than 1%.

The above simulation technique does not make use of the fact that, in the present case,  $p + q = \exp(-\beta y^2/2)$  whatever  $y$ . This allows its extension to more complicated models of elastic bounded diffusion in which such an equation may not hold.

#### Reference

(16) Smith, G. D. *Numerical Solutions of Partial Differential Equations*, Oxford Mathematical Handbook: London, 1971, p. 23.
